# Supplementary material for: In vivoanti-tumor activity of the organometallic ruthenium(ii)-arene complex [Ru(η6-p-cymene)Cl2(pta)] (RAPTA-C) in human ovarian and colorectal carcinomas
Source: Royal Society of Chemistry journal article supplement (doi:10.1039/c4sc01255k), 2014-01-01
Supplement: c4sc01255k1.pdf [file c4sc01255k1.pdf]

## Electronic Supplementary Information:

# ***In vivo* anti-tumor activity of the organometallic ruthenium(II)-arene complex [Ru( $\eta^6$ -*p*-cymene)Cl<sub>2</sub>(pta)] (RAPTA-C) in human ovarian and colorectal carcinomas**

Andrea Weiss,<sup>a,b</sup> Robert H. Berndsen,<sup>b</sup> Maxime Dubois,<sup>c</sup> Cristina Müller,<sup>c</sup> Roger Schibli,<sup>c,d</sup> Arjan W. Griffioen,<sup>b</sup> Paul J. Dyson,<sup>a\*</sup> and Patrycja Nowak-Sliwinska<sup>a\*</sup>

<sup>a</sup> Institute of Chemical Sciences and Engineering, Swiss Federal Institute of Technology (EPFL), Lausanne, Switzerland.

<sup>b</sup> Angiogenesis Laboratory, Department of Medical Oncology, VU University Medical Center, Amsterdam, The Netherlands.

<sup>c</sup> Center for Radiopharmaceutical Sciences ETH-PSI-USZ, Villigen-PSI, Switzerland.

<sup>d</sup> Department of Chemistry and Applied Biosciences, ETH Zurich, Zurich, Switzerland

\* Correspondance to:

Dr. Patrycja Nowak-Sliwinska, Institut des Sciences et Ingénierie Chimiques, Ecole Polytechnique Fédérale de Lausanne (EPFL), CH-1015 Lausanne, Switzerland; Tel: +41 21 693 5169, Fax: + 41 61 693 5110, e-mail: [Patrycja.Nowak-Sliwinska@epfl.ch](mailto:Patrycja.Nowak-Sliwinska@epfl.ch)

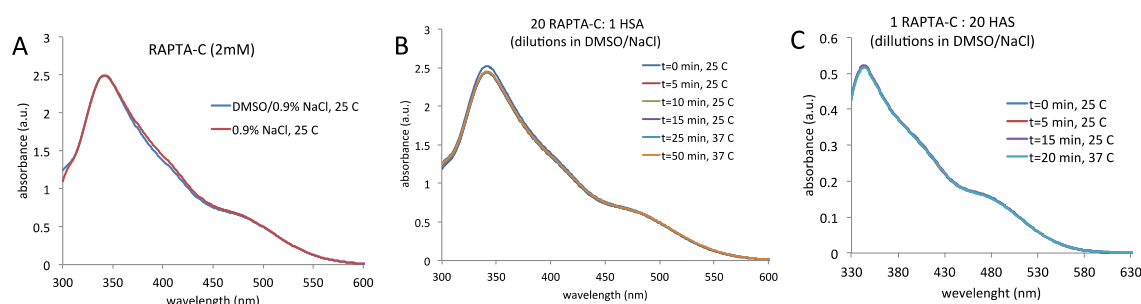

**Figure S1.** Spectral profiles for RAPTA-C solutions in various solvents recorded at 25°C or 37°C. HSA: human serum albumin. Absorption spectra of RAPTA-C solutions were recorded with a two-beam Varian Cary UV-Vis-NIR 500 Scan spectrophotometer in 1cm quartz cuvettes (Suprasil, Hellma, Müllheim, Germany) between 300 and 600 nm with an average scan speed of 600 nm/min at 25°C or 37°C. These spectra indicate that RAPTA-C is stable under the tested conditions.

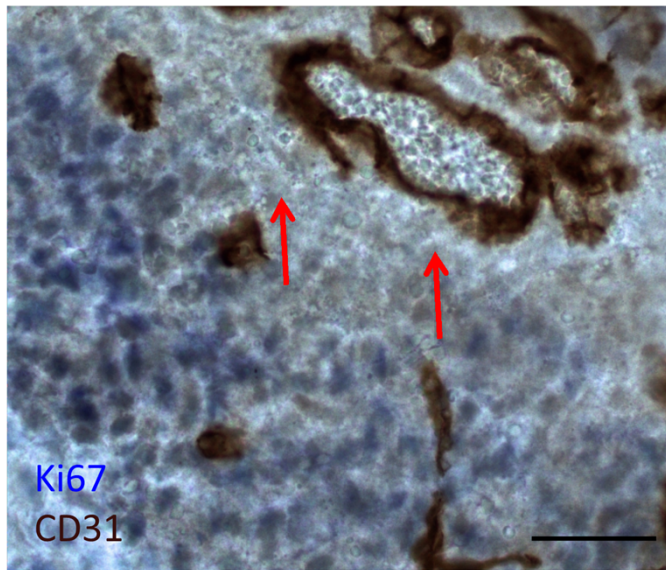

**Figure S2.** Image showing immunohistochemical staining of LS174T tumor treated with RAPTA-C at  $100 \text{ mg kg}^{-1}$ . The islands of tumor cells (red arrows) around the vasculature (CD31, in brown) were Ki-67 negative, meaning that tumor cells were in a quiescent state. On the tumor periphery Ki-67 (in blue) tumor cells were visible.

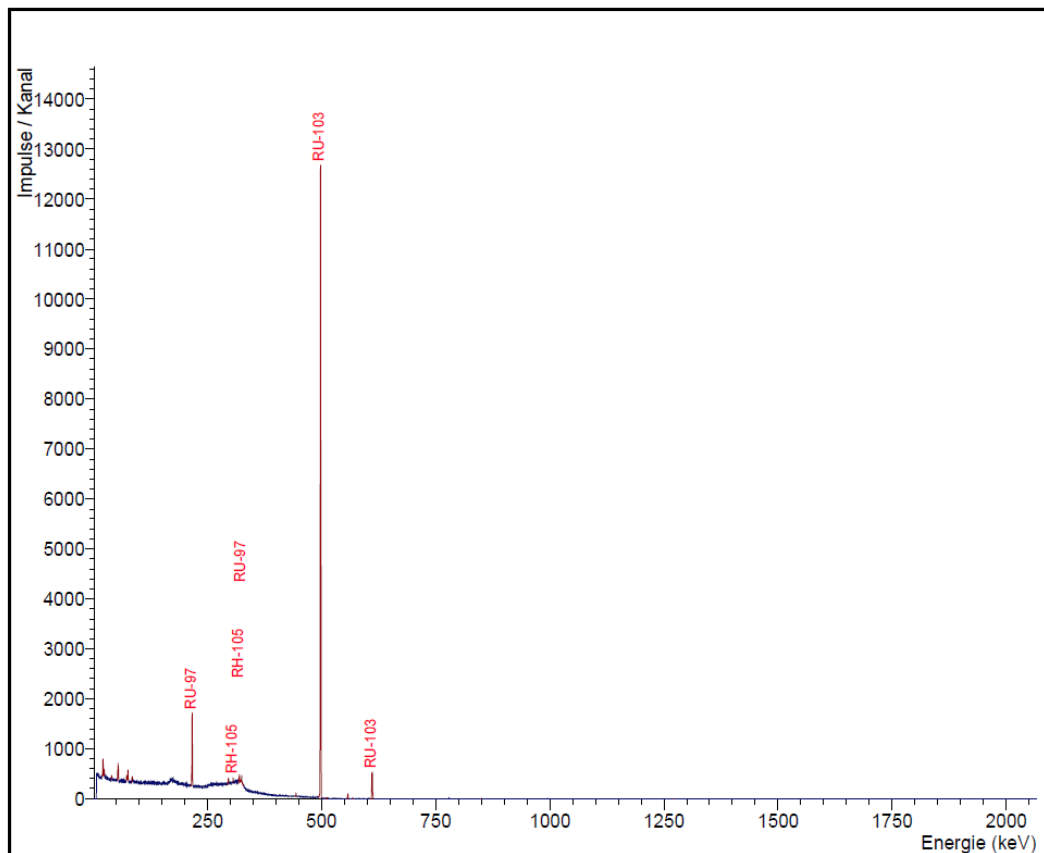

**Figure S3.**  $\gamma$ -ray spectrometry after work-up of the target material. The spectrum shows the  $\gamma$ -rays of  $^{103}\text{Ru}$  (497 keV, 91% and 610 keV, 5.8%) and  $\gamma$ -rays of traces of  $^{97}\text{Ru}$  (215, 85.6% and 324 keV, 10.8%) as well as  $^{105}\text{Ru}$  (316 keV, 11.1%) are also visible.

### Equation used to estimate $^{103}\text{Ru}$ activity

$$A_{^{103}\text{Ru}} = N_{^{102}\text{Ru}} \cdot \sigma \cdot \phi \cdot (1 - e^{-\lambda \cdot t})$$

A: activity [Bq]

N: number of  $^{102}\text{Ru}$  atoms

$\sigma$ : thermal cross section of  $^{102}\text{Ru}$  [barn]

$\phi$ : neutron flux [ $\text{n} \cdot \text{cm}^{-2} \cdot \text{s}^{-1}$ ]

$\lambda$ :  $\frac{\ln(2)}{T_{1/2}}$  [ $\text{h}^{-1}$ ]

t: irradiation time [h]
